# Supplementary material for: Assessing the Quality of Serological Testing in the COVID-19 Pandemic: Results of a European External Quality Assessment (EQA) Scheme for Anti-SARS-CoV-2 Antibody Detection
Source: PubMed Central journal article supplement (PMC8373014; doi:10.1128/jcm.00559-21), 2021-08-18

# Supplemental Figure 1

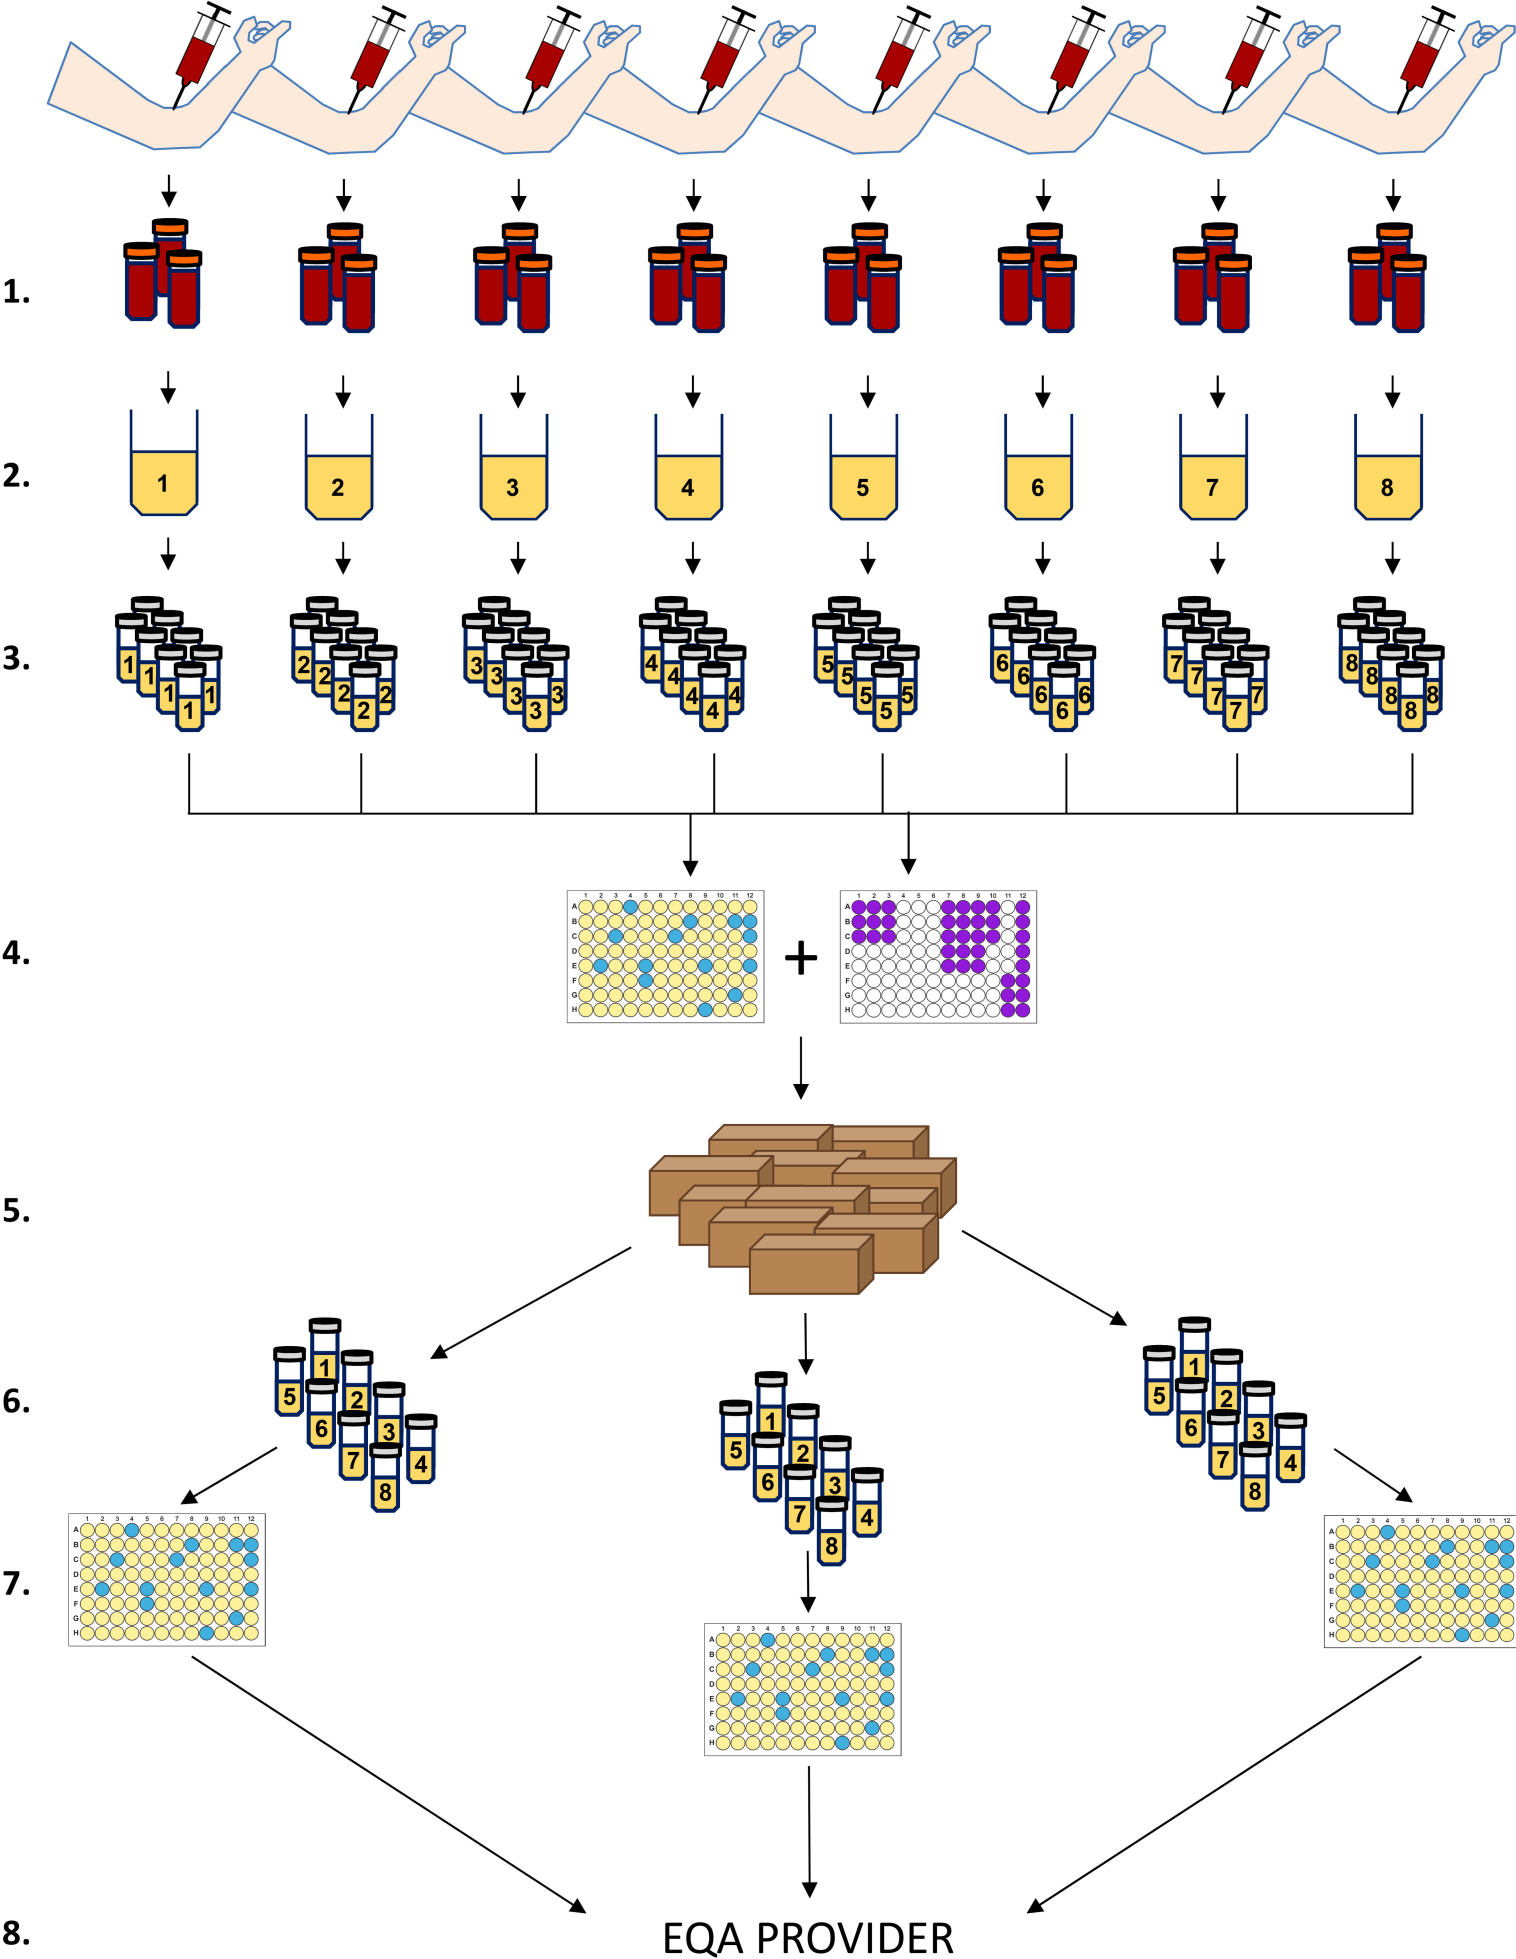

Supplement: jcm.00559-21-s0002.pdf [file jcm.00559-21-s0002.pdf]
